# Supplementary material for: A Usability Study of a Serious Game in Cognitive Rehabilitation: A Compensatory Navigation Training in Acquired Brain Injury Patients
Source: PubMed Central journal article supplement (PMC5996119; doi:10.3389/fpsyg.2018.00846), 2018-06-05
Supplement: Data_Sheet_1.pdf [file Data_Sheet_1.pdf]

## *Supplementary Material*

### **A usability study of a serious game in cognitive rehabilitation: a compensatory navigation training in acquired brain injury patients**

**Milan N. A. van der Kuil, Johanna M. A. Visser-Meily, Andrea W. M. Evers, Ineke J. M. van der Ham**

**Correspondence:** Milan N. A. van der Kuil: [m.n.a.van.der.kuil@fsw.leidenuniv.nl](mailto:m.n.a.van.der.kuil@fsw.leidenuniv.nl)

Supplementary Table 1

| Question/Statement                                                    | Response**<br>mean (SD) |
|-----------------------------------------------------------------------|-------------------------|
| <i>Based on the past year ... (ranging from yearly to daily)</i>      |                         |
| How often do you use a computer                                       | 4.43 (1.10)             |
| How often do you play video games                                     | 1.9 ( 1.35)             |
| How often do you use the arrow keys when playing videogames           | 1.57 (1.14)             |
| How often do you use a joystick or controller when playing videogames | 1.63 (1.13)             |
| <i>Please answer:</i>                                                 |                         |
| I know how to start a computer                                        | 4.83 (0.75)             |
| I know how use a computer mouse                                       | 4.83 (0.59)             |
| I know how to use text editing software                               | 4.53 (1.25)             |
| I know how to use the internet to find things                         | 4.87 (0.73)             |
| I feel stressed when I use the computer*                              | 4 (1.46)                |

---

**Supplementary Table 1.** Computer experience questionnaire. \*Data shown on a reversed scale. \*\*Ratings on a Likert scale with 1 corresponding to “completely disagree” and 5 corresponding to “completely agree”. Standard Deviations appear in parentheses next to means.

Supplementary Table 2

---

| Nr.                            | Question                                                                               |
|--------------------------------|----------------------------------------------------------------------------------------|
| <i>Sense of direction game</i> |                                                                                        |
| 1                              | In this task I train my memory of landmarks (false)                                    |
| 2                              | I can confirm my pointing direction by pressing “Enter” key (false)                    |
| 3                              | Whenever I have to point towards the stone a green arrow will appear (true)            |
| 4                              | The stone is located in the starting room (true)                                       |
| 5                              | If I point directly towards the stone I earn 1 coin (false)                            |
| 6                              | I have to remember where the ending location is (true)                                 |
| 7                              | When the wall become transparent I can reorient myself (true)                          |
| 8                              | When I use this strategy in the real world I do not have to remember landmarks (true)  |
| 9                              | I can imagine my sense of direction as a compass pointing to a certain location (true) |
| 10                             | It is important I form a mental map of the environment (false)                         |
| 11                             | I have to remember the layout of the corridors (false)                                 |
| 12                             | When I have to point to the stone I can always walk back (false)                       |

---

**Supplementary Table 2** Questions following instruction text/video for game A.

Supplementary Table 3

---

| Nr.                 | Question                                                                                          |
|---------------------|---------------------------------------------------------------------------------------------------|
| <i>Map use game</i> |                                                                                                   |
| 1                   | In this task I train my sense of direction (false)                                                |
| 2                   | In this task I learn how to interact with maps (true)                                             |
| 3                   | I have to walk towards the room containing the minotaurs (false)                                  |
| 4                   | I must try to visit as few rooms as possible (true)                                               |
| 5                   | I lose a coin whenever I enter a dead-end corridor (false)                                        |
| 6                   | The landmarks in the maze are shown on the minimap (true)                                         |
| 7                   | Planning of the route is important in the last round (true)                                       |
| 8                   | I have to remember how many minotaurs are in the maze (false)                                     |
| 9                   | I can use the dead-ends to determine my location on the map (true)                                |
| 10                  | If I master this exercise, I will become better at using google maps to navigate in a city (true) |
| 11                  | The tasks will be easier when there a more rooms in the maze (false)                              |
| 12                  | The best strategy is to always turn left (false)                                                  |

---

**Supplementary Table 3** Questions following instruction text/video for game B.

Supplementary Table 4

| Round | Cumulative Feedback | Delayed Feedback |
|-------|---------------------|------------------|
|       | mean (SD)           | mean (SD)        |
| All   | 3.48 (1.63)         | 3.95 (1.75)      |
| 1     | 1.00 (0.84)         | 1.43 (0.93)      |
| 2     | 1.48 (0.87)         | 1.67 (0.66)      |
| 3     | 1.00 (0.95)         | 0.86 (0.96)      |

**Supplementary Table 4** Objective performance in the feedback timing task. Average number of coins are shown for each round. Two coins could be collected per round.
